# Supplementary material for: The role of brain perivascular space burden in early-stage Parkinson’s disease
Source: PubMed Central journal article supplement (PMC7864928; doi:10.1038/s41531-021-00155-0), 2021-02-05
Supplement: 41531_2021_155_MOESM1_ESM.pdf [file 41531_2021_155_MOESM1_ESM.pdf]

To view the full contents of this document, you need a later version of the PDF viewer. You can upgrade to the latest version of Adobe Reader from [www.adobe.com/products/acrobat/readstep2.html](http://www.adobe.com/products/acrobat/readstep2.html)

For further support, go to [www.adobe.com/support/products/acrreader.html](http://www.adobe.com/support/products/acrreader.html)
